# Supplementary material
Source: PubMed Central journal article supplement (PMC2049064)
Supplement: ajrccm_176_1_42__1.pdf [file ajrccm_176_1_42__1.pdf]

**Online supplement**

**Genetic Determinants of Emphysema Distribution in the National Emphysema**

**Treatment Trial**

Dawn L. DeMeo, Craig P. Hersh, Eric A. Hoffman, Augusto A. Litonjua Ross

Lazarus, David Sparrow, Joshua O. Benditt , Gerard Criner , Barry Make,

Fernando J. Martinez, Paul D. Scanlon, Frank C. Sciurba, James P. Utz, John J.

Reilly, Edwin K. Silverman

Table E1: Genetic polymorphisms analyzed in the NETT Genetics Ancillary Study CT analysis.

| Gene                                                        | HUGO Symbol | Number of markers |
|-------------------------------------------------------------|-------------|-------------------|
| Alpha 1-antichymotrypsin                                    | SERPINA3    | 2                 |
| Elastin                                                     | ELN         | 1                 |
| Microsomal epoxide hydrolase                                | EPHX1       | 8                 |
| Vitamin D binding protein                                   | GC          | 2                 |
| G-coupled receptor C5a                                      | GPRC5A      | 1                 |
| Glutathione S-transferase M1                                | GSTM1       | 1*                |
| Glutathione S-transferase P1                                | GSTP1       | 2                 |
| Interleukin-8 receptor, alpha                               | IL8RA       | 9                 |
| Interleukin-8 receptor, beta                                | IL8RB       | 6                 |
| Latent transforming growth factor beta binding protein<br>4 | LTBP4       | 4                 |
| Matrix Gla protein                                          | MGP         | 3                 |
| Microsomal glutathione S-transferase-1                      | MGST1       | 4                 |
| Matrix metalloprotease-1                                    | MMP1        | 1**               |
| Matrix metalloprotease-12                                   | MMP12       | 3                 |
| Serine protease inhibitor E2                                | SERPINE2    | 17                |
| Surfactant protein B                                        | SFTPB       | 1                 |
| Surfactant protein D                                        | SFTPD       | 2                 |
| Transforming Growth Factor beta-1                           | TGFB1       | 5                 |

|                                        |       |   |
|----------------------------------------|-------|---|
| Tissue inhibitor of metalloproteases-2 | TIMP2 | 1 |
| Tumor necrosis factor alpha            | TNF   | 4 |

Total 77 polymorphisms in 20 genes

\*GSTM1 null deletion

\*\*MMP1 single base pair insertion/deletion
